# Supplementary material for: Phase transformation of iron oxide to carbide and Fe3C as an active center for the RWGS reaction
Source: Royal Society of Chemistry journal article supplement (doi:10.1039/d1nj04120g), 2021-01-01
Supplement: d1nj04120g1.pdf [file d1nj04120g1.pdf]

## Supporting Information

### **Phase Transformation of Iron oxide to Carbide and Fe<sub>3</sub>C being Active Centers for RWGS Reaction**

Yang Liu ‡, Palle Ramana Murthy ‡, Xiao Zhang, Haiyan Wang and Chuan Shi \*

*State Key Laboratory of Fine Chemicals, College of Chemical Engineering, Dalian  
University of Technology, Dalian 116024, China*

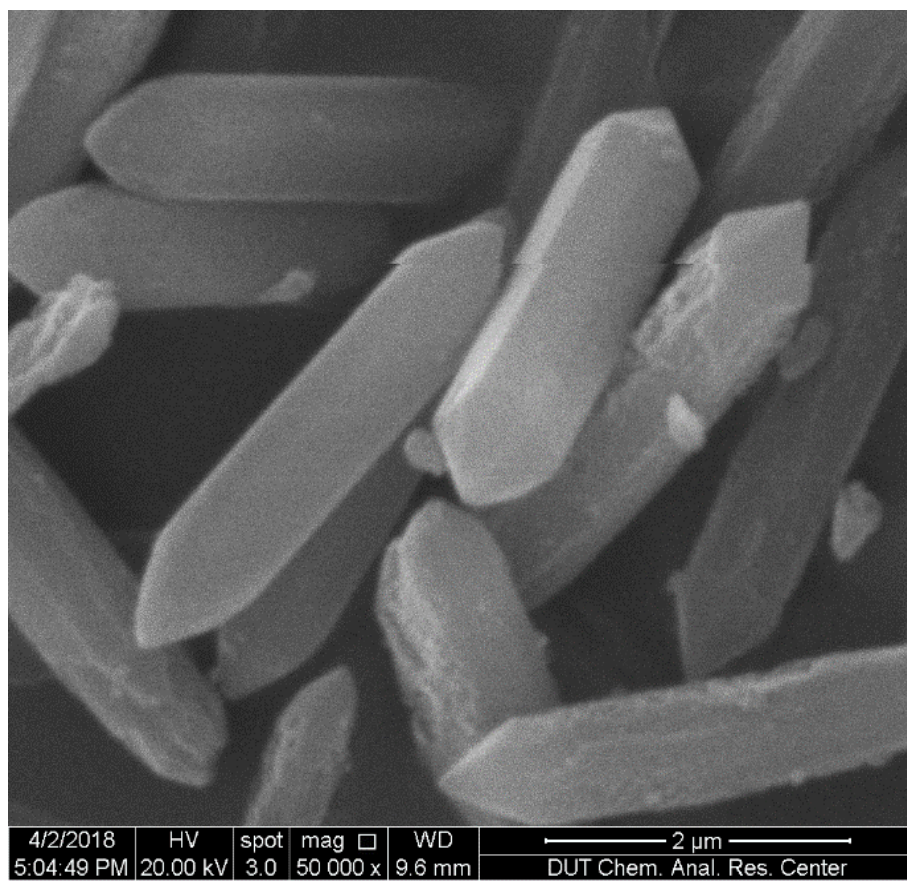

**Figure S1** SEM image of as-prepared spindle-like MIL-88A.

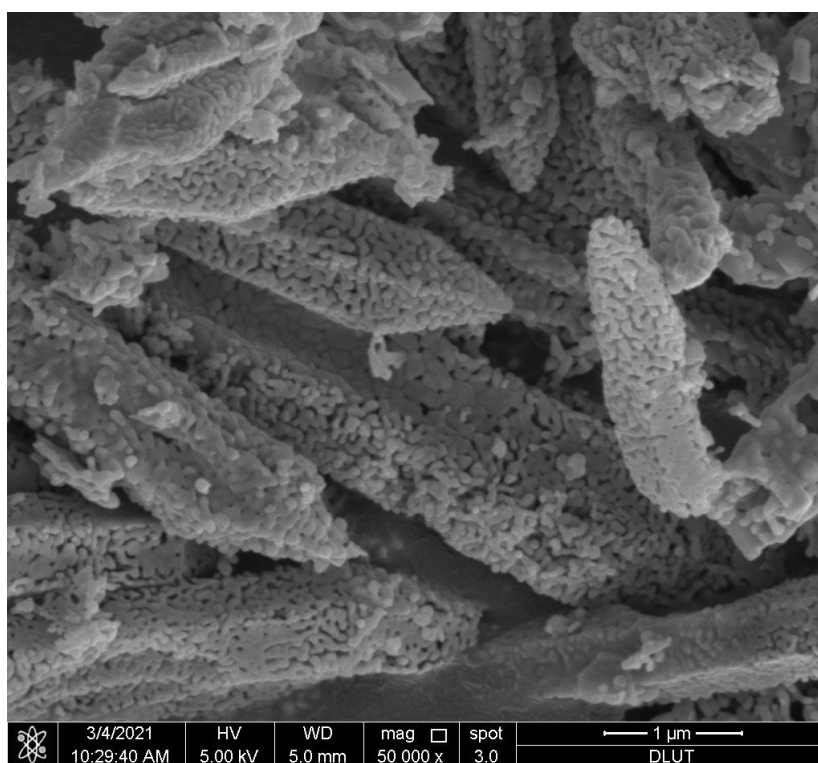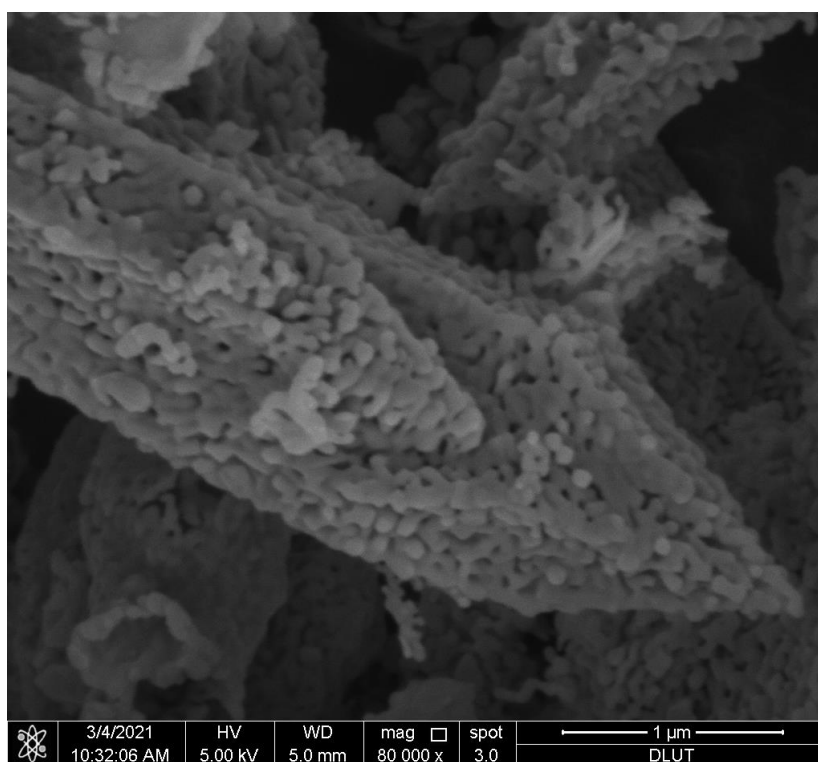

**Figure S2** SEM images of Mil-88A derived spindle-like  $\alpha$ - $\text{Fe}_2\text{O}_3$ .

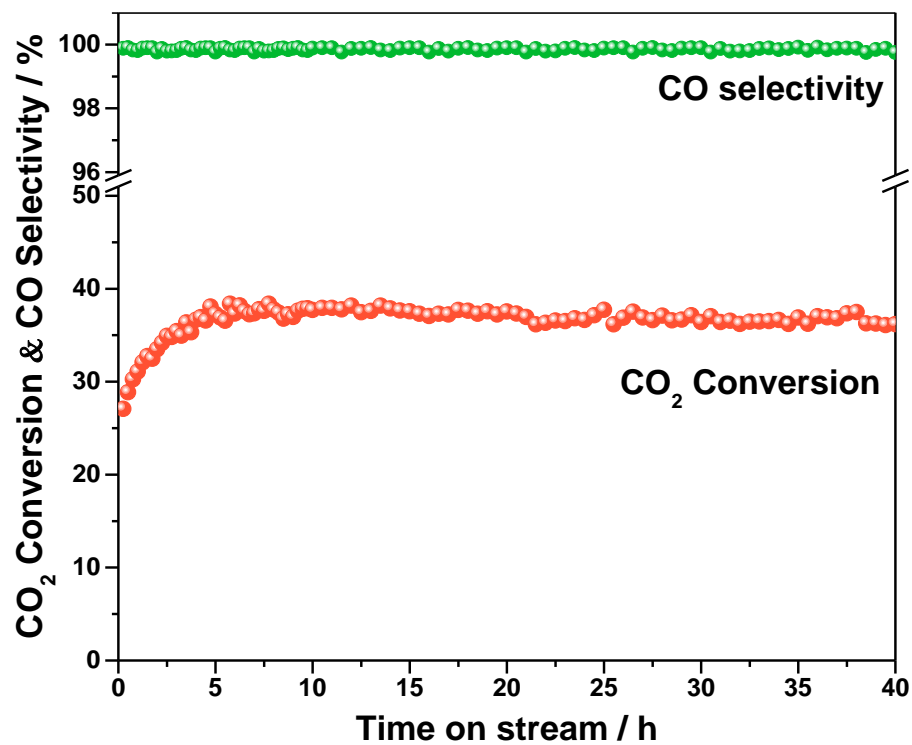

**Figure S3** CO<sub>2</sub> conversion and CO selectivity of as-prepared spindle-like iron oxide in RWGS. Reaction conditions: 600 °C, ambient pressure, CO<sub>2</sub>/H<sub>2</sub> (v/v)=1/2, WHSV=300,000 mL/g/h.

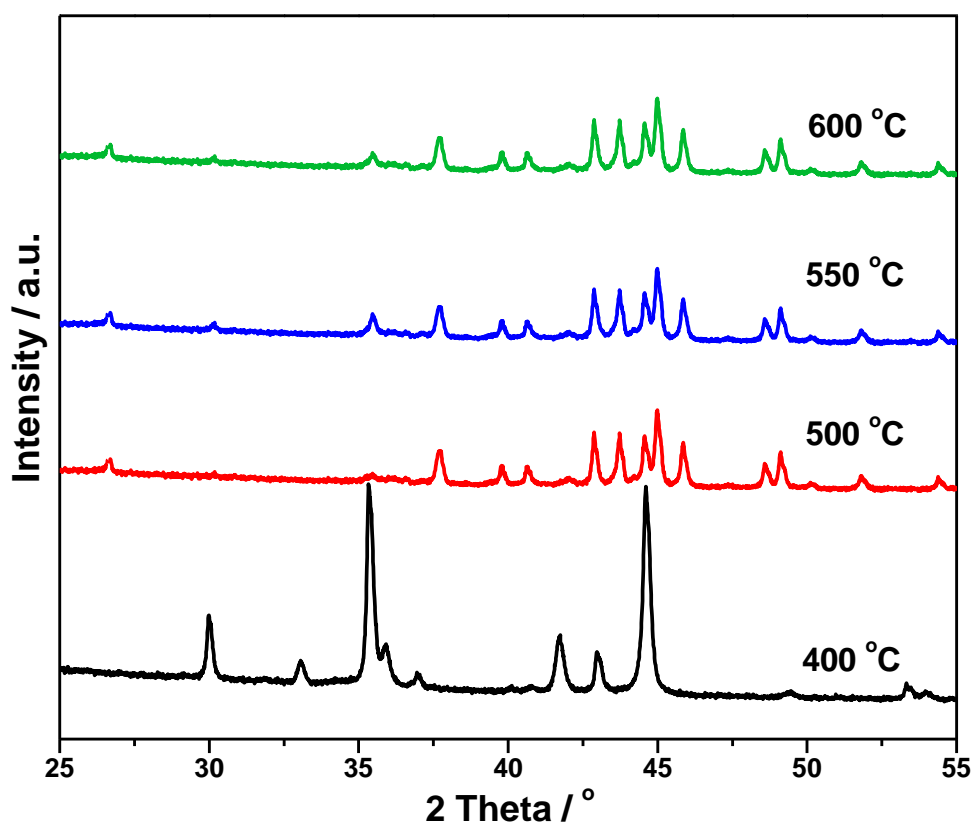

**Figure S4** XRD patterns of the spent samples after 15h at 400 °C, 500 °C, 550 °C and 600 °C.

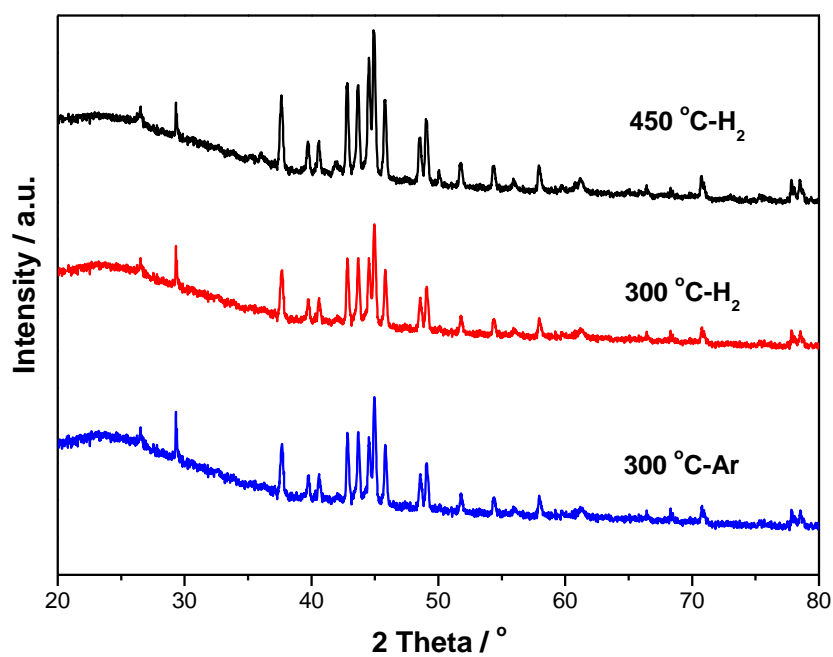

**Figure S5** XRD patterns of the spent samples after 15h at 600 °C after different pretreatments. Reaction conditions: 0.1 MPa, CO<sub>2</sub>/H<sub>2</sub> (v/v)=1/2, WHSV=300,000 mL/g/h.

**Table S1** Comparison of catalytic performance for the in-situ formed Fe<sub>3</sub>C and Literature Reported Catalysts

| Catalyst                            | Reaction temp. (°C) | Space velocity (mL/g/h) | CO <sub>2</sub> Conv. (%) | CO Sel. (%) | Producing CO rate (mmol/g/h) | Ref.     |
|-------------------------------------|---------------------|-------------------------|---------------------------|-------------|------------------------------|----------|
| In-situ formed Fe <sub>3</sub> C    | 600                 | 300,000                 | 38                        | ca. 100     | 1695                         | Our work |
|                                     | 550                 | 300,000                 | 33                        | ca. 100     | 1471                         |          |
|                                     | 500                 | 300,000                 | 28                        | ca. 100     | 1249                         |          |
| Mo <sub>2</sub> C@N-C               | 600                 | 24,000                  | 58                        | 98          | 152                          | 1        |
| Fe-Ce-Al                            | 600                 | 30,000                  | 55                        | 99          | 146                          | 2        |
| NiCu-Saponite                       | 500                 | 15,000                  | 53                        | 89          | 63                           | 3        |
| MnO                                 | 850                 | 200,000                 | 50                        | 100         | 893                          | 4        |
| Mo <sub>2</sub> C                   | 550                 | 12,000                  | 60                        | 100         | 64                           | 5        |
| Cs-Mo <sub>2</sub> C                | 550                 | 12,000                  | 66                        | 100         | 70                           | 6        |
| Fe oxide                            | 600                 | 6,000                   | 35                        | 100         | 47                           | 7        |
| CsFe/Al <sub>2</sub> O <sub>3</sub> | 600                 | 12,000                  | 63                        | 98          | 66                           | 8        |
| BaZrYZn                             | 600                 | 2,400                   | 37.5                      | 97          | 19                           | 9        |
| Co-CeO <sub>2</sub>                 | 600                 | 600,000                 | 35                        | 98.5        | 4617                         | 10       |
| Ru/CeO <sub>2</sub>                 | 600                 | 120,000                 | 38                        | ca. 100     | 1017                         | 11       |
| β-Mo <sub>2</sub> C                 | 600                 | 300,000                 | 42.5                      | 99          | 1878                         |          |

1. Journal of Energy Chemistry 50 (2020) 37–43
2. Applied Catalysis A, General 593 (2020) 117442
3. Applied Catalysis B: Environmental 261 (2020) 118241
4. Nanoscale 11 (2019) 16677–16688
5. Applied Catalysis B: Environmental 244 (2019) 889–898
6. Journal of Industrial and Engineering Chemistry 23 (2015) 67–71
7. Catalysts 8 (2018) 608
8. ACS Catalysis. 4 (2014) 3117–3122
9. Catalysis Today 316 (2018) 155–161
10. Journal of CO<sub>2</sub> Utilization 26 (2018) 350–358
11. ACS Catalysis. 7 (2017) 912–918
